# Supplementary material for: Reinstatement of long-term memory following erasure of its behavioral and synaptic expression in Aplysia
Source: eLife journal article supplement (doi:10.7554/elife.03896), 2014-11-17
Supplement: supp [file elife-03896-supp-v1.zip]

Archive with 3 entries (3 files):
- elife_poa_e03896_Figure_5_figure_supplement_1.pdf
- elife_poa_e03896_Figure_3_figure_supplement_1.pdf
- elife_poa_e03896_Figure_1_figure_supplement_1.pdf
