# Supplementary material for: Reinstatement of long-term memory following erasure of its behavioral and synaptic expression in Aplysia
Source: eLife journal article supplement (doi:10.7554/elife.03896), 2014-11-17
Supplement: supp [file elife-03896-supp-v1.zip › elife_poa_e03896_Figure_1_figure_supplement_1.pdf]

**Figure 1-figure supplement 1**

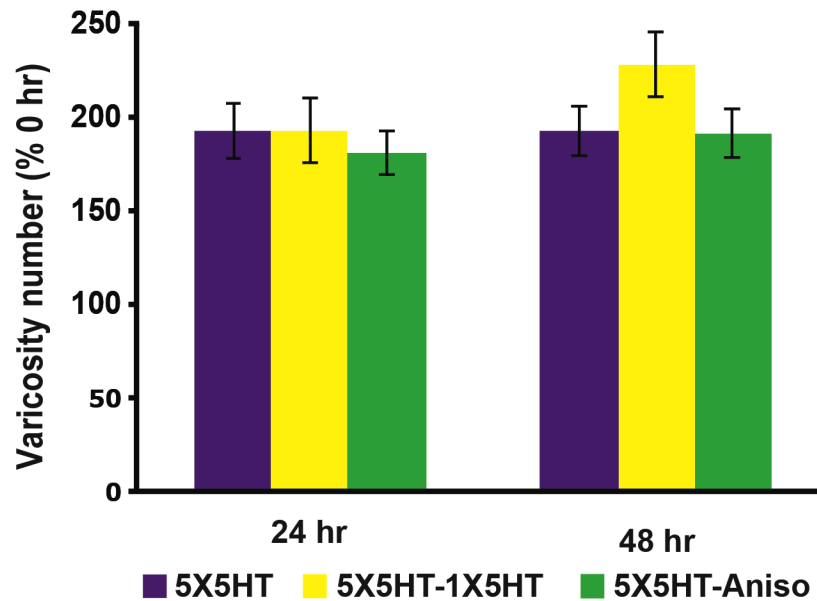

**Figure 1-figure supplement 1.** Graphs presenting the normalized mean varicosity numbers for the three 5HT-trained groups not subjected to reconsolidation blockade. The mean normalized varicosity number at 24 hr was  $192.7 \pm 15.0\%$  in the 5X5HT group ( $n = 18$ ),  $193.3 \pm 17.6\%$  in the 5X5HT-1X5HT group ( $n = 3$ ), and  $180.9 \pm 11.6\%$  in the 5X5HT-Aniso group ( $n = 19$ ). At 48 hr the mean normalized varicosity number was  $192.9 \pm 13.7\%$  in the 5X5HT group,  $228.3 \pm 17.4\%$  in the 5X5HT-1X5HT group, and  $191.6 \pm 13.2\%$  in the 5X5HT-Aniso group. A repeated-measures ANOVA indicated that neither the interaction ( $F_{[2,37]} = 0.8$ ,  $p = 0.45$ ), nor the overall effects of group ( $F_{[2,37]} = 0.3$ ,  $p = 0.73$ ), was significant.
