# Supplementary material for: Reinstatement of long-term memory following erasure of its behavioral and synaptic expression in Aplysia
Source: eLife journal article supplement (doi:10.7554/elife.03896), 2014-11-17
Supplement: supp [file elife-03896-supp-v1.zip › elife_poa_e03896_Figure_3_figure_supplement_1.pdf]

Figure 3-figure supplement 1

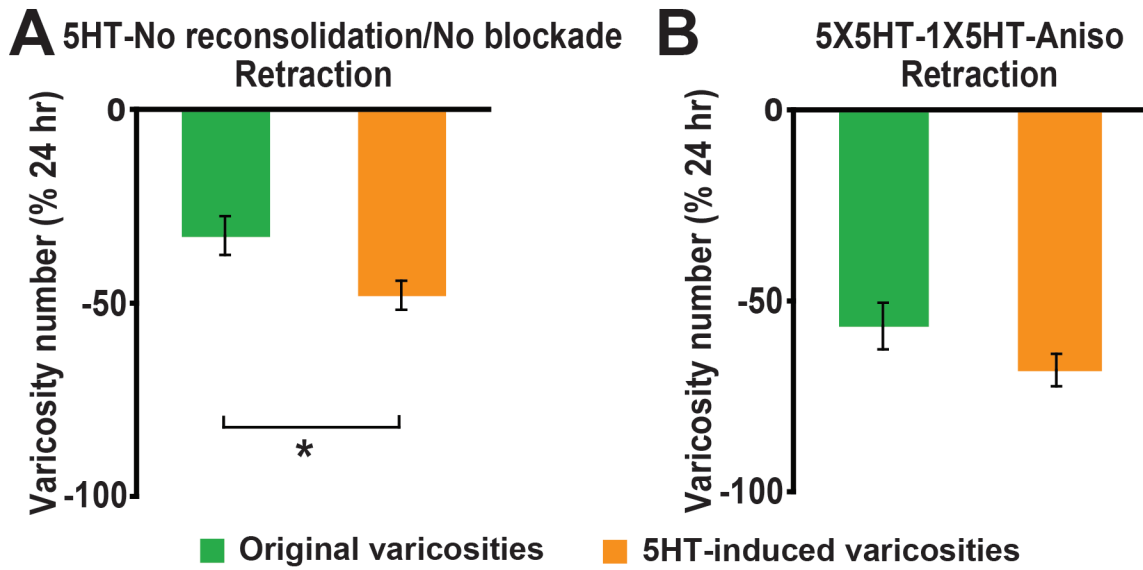

**Figure 3-figure supplement 1.** Comparison of retraction of Original and 5HT-induced varicosities between 24-48 hr in the reconsolidation blockade experiments. **(A)** The percent retraction of 5HT-induced varicosities ( $47.7 \pm 3.7\%$ ) was significantly greater than that of the Original varicosities ( $32.3 \pm 5.1\%$ ,  $p < 0.02$ , two-tailed  $t$ -test) in the 5HT-No reconsolidation/No blockade group. **(B)** The percent retraction of the 5HT-induced varicosities ( $67.9 \pm 4.2\%$ ) did not differ significantly from that of Original varicosities ( $56.4 \pm 6.1\%$ ) in the 5X5HT-1X5HT-Aniso group.
