# Supplementary material for: Reinstatement of long-term memory following erasure of its behavioral and synaptic expression in Aplysia
Source: eLife journal article supplement (doi:10.7554/elife.03896), 2014-11-17
Supplement: supp [file elife-03896-supp-v1.zip › elife_poa_e03896_Figure_5_figure_supplement_1.pdf]

Figure 5-figure supplement 1

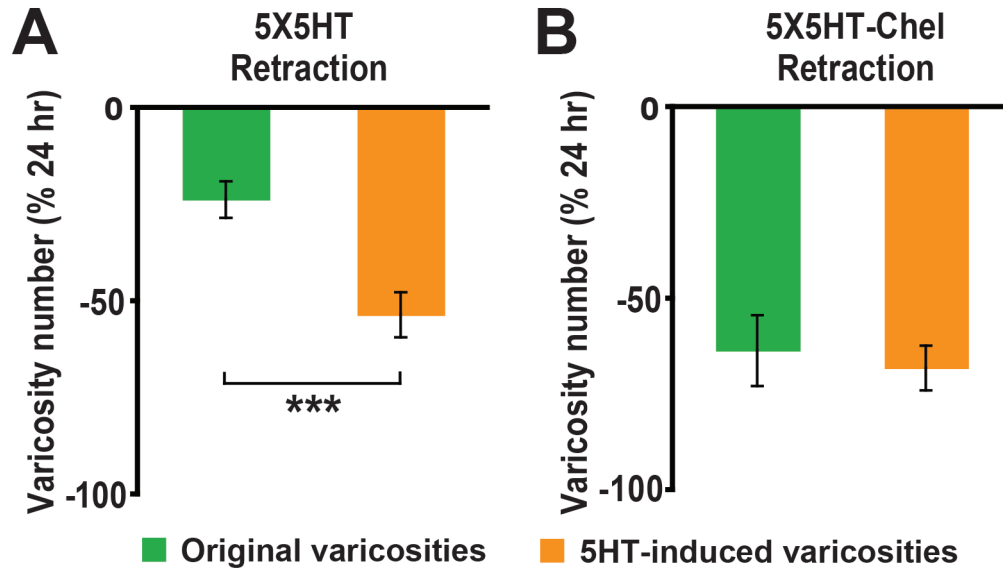

**Figure 5-figure supplement 1.** Comparison of retraction of Original and 5HT-induced varicosities between 24-48 hr in the chelerythrine treatment experiments. **(A)** The difference in the percent retraction between 5X5HT-induced ( $53.4.0 \pm 5.8\%$ ) and Original ( $23.5 \pm 4.7\%$ ) varicosities was highly significant in the 5X5HT group ( $p < 0.001$ , two-tailed  $t$ -test). **(B)** There was no significant difference in the percent retraction between 5HT-induced ( $68.0 \pm 5.8\%$ ) and Original ( $63.4 \pm 9.3\%$ ) varicosities in the 5X5HT-Chel group.
